# Supplementary material for: Eomesodermin in CD4+T cells is essential for Ginkgolide K ameliorating disease progression in experimental autoimmune encephalomyelitis
Source: PubMed Central journal article supplement (PMC7757039; doi:10.7150/ijbs.50041), 2021-01-01

**Supplementary table 1. Primer pairs for qRT-PCR**

| <b>Name</b>        | <b>Species</b> | <b>Sequence</b>        |
|--------------------|----------------|------------------------|
| mRORC-q-F          | Mus musculus   | AGCTGCGACTGGAGGACCTT   |
| mRORC-q-R          | Mus musculus   | CCCGTGAAAAGAGGTTGGTG   |
| mEOMES-q-F         | Mus musculus   | GTGACGGCCTACCAAAACAC   |
| mEOMES-q-R         | Mus musculus   | GACCTCCAGGGACAATCTGA   |
| mT-bet-q-F         | Mus musculus   | CCATTCCTGTCCTTCACCGT   |
| mT-bet-q-R         | Mus musculus   | CCTGTAATGGCTTGTGGGCT   |
| mFOXP3-q-F         | Mus musculus   | CACCTATGCCACCCTTATCC   |
| mFOXP3-q-R         | Mus musculus   | GAAGTAGGCGAACATGCGAG   |
| mIL17a-F           | Mus musculus   | CACCTCACACGAGGCACAAG   |
| mIL17a-R           | Mus musculus   | CAGCAACAGCATCAGAGACACA |
| mJun-F             | Mus musculus   | TGGGCACATCACCCTACAC    |
| mJun-R             | Mus musculus   | GACACTGGGAAGCGTGTCT    |
| m $\beta$ -actin-F | Mus musculus   | GAGACCTTCAACACCCAG     |
| m $\beta$ -actin-R | Mus musculus   | CATCACAATGCCTGTGGTAC   |

Supplemental figure 1

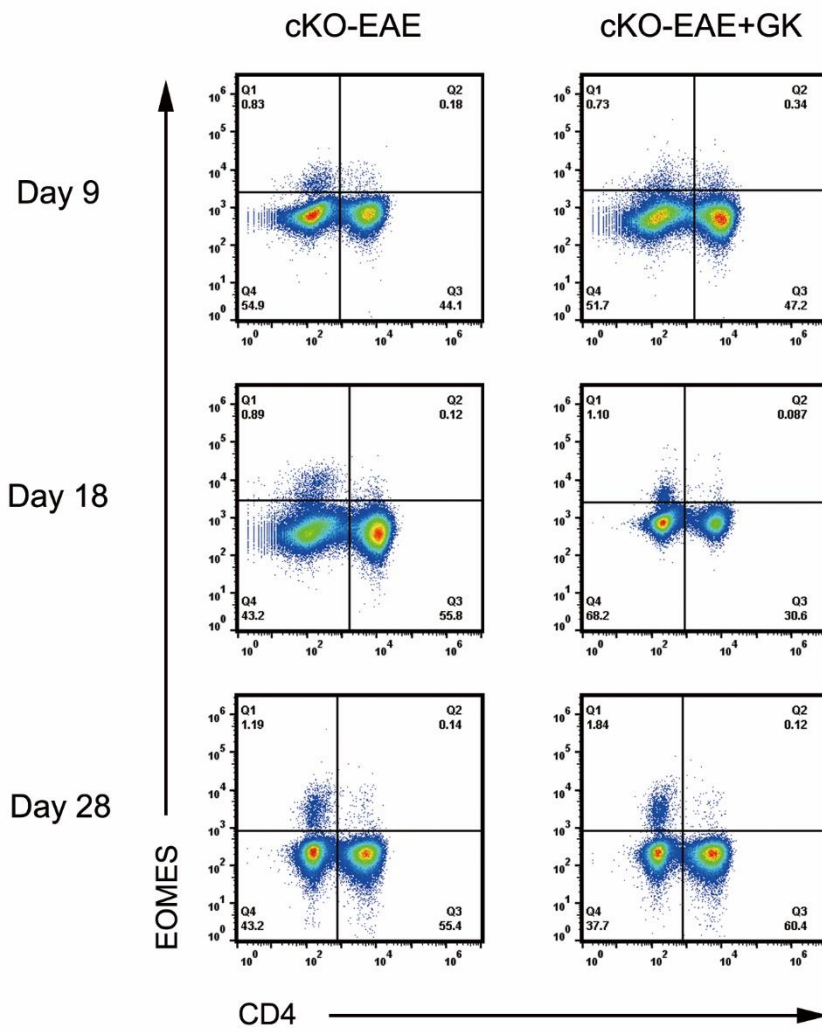

Supplement: ijbsv17p0050s1.pdf [file ijbsv17p0050s1.pdf]
